# Supplementary material for: Thermally reduced mesoporous manganese MOF @reduced graphene oxide nanocomposite as bifunctional electrocatalyst for oxygen reduction and evolution
Source: Royal Society of Chemistry journal article supplement (doi:10.1039/d0ra04193a), 2020-01-01
Supplement: d0ra04193a1.pdf [file d0ra04193a1.pdf]

## Supplementary Information

### Thermally reduced mesoporous manganese MOF@ reduced graphene oxide nanocomposite as bifunctional electrocatalyst for oxygen reduction and evolution

Abdul Wahab,<sup>\*a</sup> Naseem Iqbal,<sup>\*\*a</sup> Tayyaba Noor,<sup>b</sup> Sheeraz Ashraf,<sup>a</sup> Muhammad Arslan Raza,<sup>a</sup> Awais Ahmad,<sup>a</sup> Usman Ali Khan,<sup>a</sup>

<sup>a</sup> U.S-Pakistan Center for Advanced Studies in Energy, National University of Sciences and Technology, Islamabad 44000, Pakistan.

<sup>b</sup> School of Chemical and Materials Engineering, National University of Sciences and Technology, Islamabad 44000, Pakistan.

Corresponding Authors

\*Email: [abdul\\_che06@scme.nust.edu.pk](mailto:abdul_che06@scme.nust.edu.pk) \*\*Email: [naseem@uspcase.nust.edu.pk](mailto:naseem@uspcase.nust.edu.pk)

Fig. S1: Optical images of prepared (a) MnBDC@75%rGO, (b) MnBDC@50%rGO, (c) MnBDC@25%rGO and (d) MnBDC annealed samples ready for electrochemical measurements.

Fig. S2: SEM micrographs of (a-d) graphene oxide prepared by improved Hummer's method.

Fig. S3: SEM micrographs of (a-h) MnBDC@75%GO nanocomposite.

Fig. S4: SEM micrographs of (a-h) MnBDC@75%rGO nanocomposite.

Fig. S5: XRD pattern of MnBDC@50%rGO nanocomposite.

Fig. S6: XRD pattern of MnBDC@25%rGO nanocomposite.

Fig. S7: FTIR spectrum of MnBDC@50%rGO nanocomposite.

Fig. S8: FTIR spectrum of MnBDC@25%rGO nanocomposite.

Table S1: ORR and OER electrocatalytic performance parameters of recently reported rGO composite catalysts.

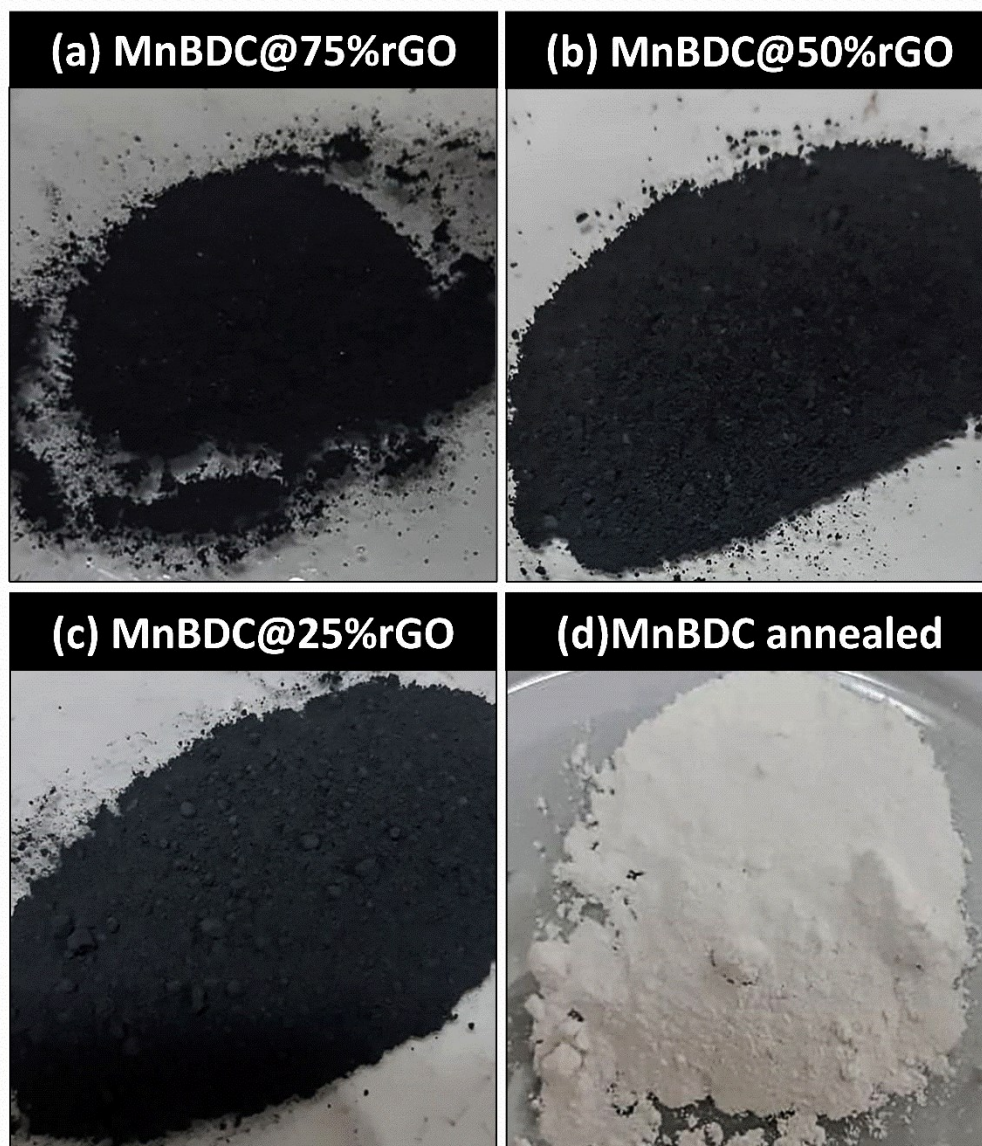

Fig. S1: Optical images of prepared (a) MnBDC@75%rGO, (b) MnBDC@50%rGO, (c) MnBDC@25%rGO and (d) MnBDC annealed samples ready for electrochemical measurements.

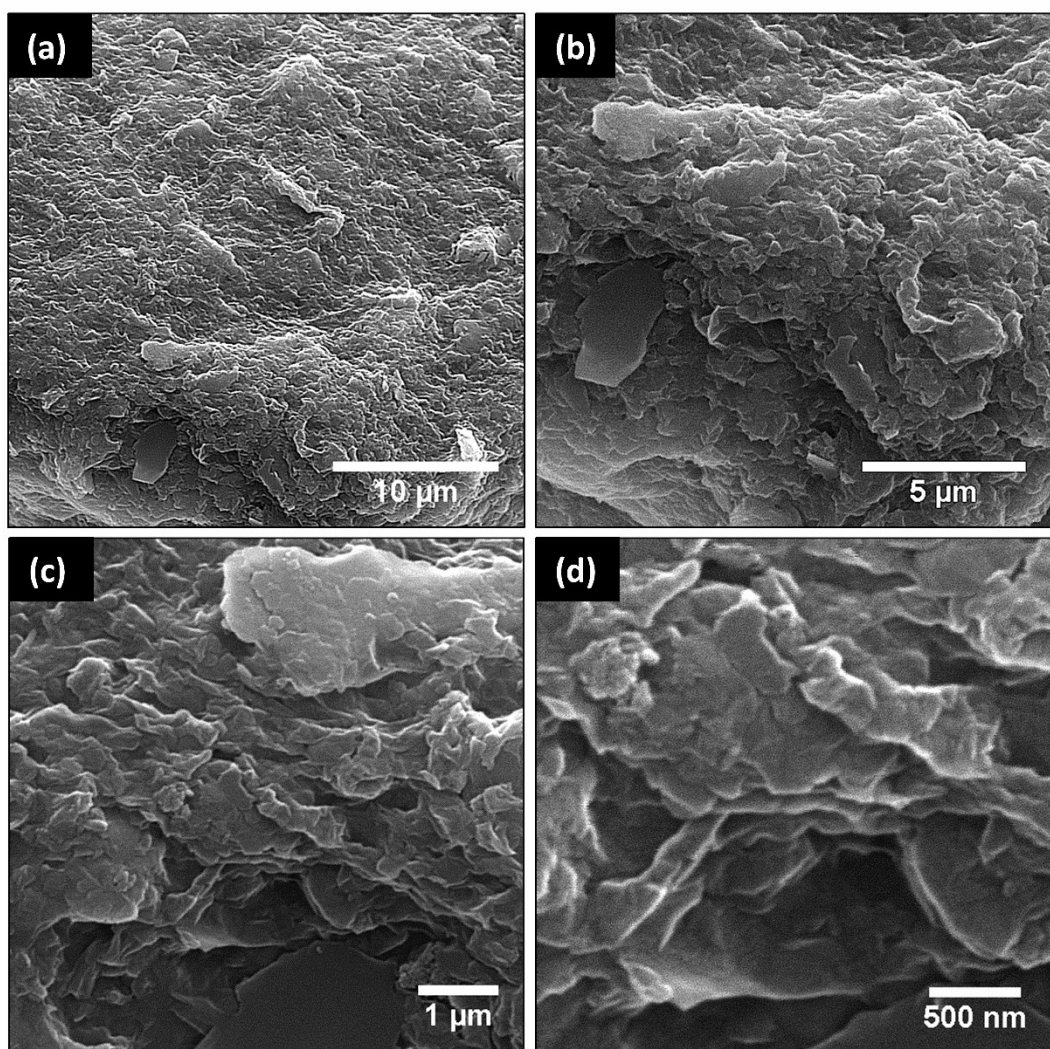

Fig. S2: SEM micrographs of (a-d) graphene oxide prepared by improved Hummer's method.

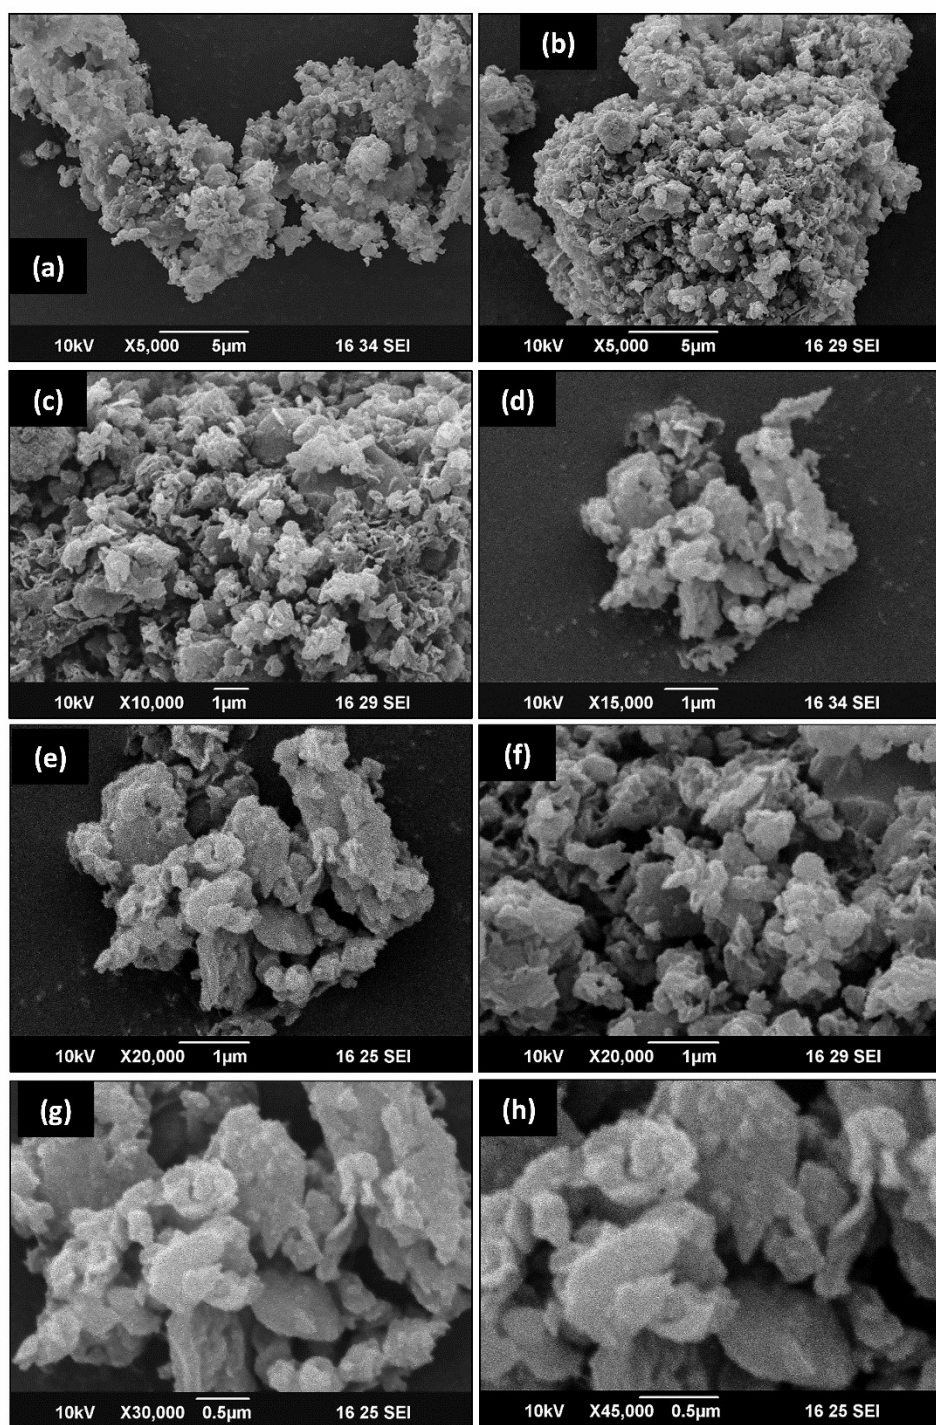

Fig. S3: SEM micrographs of (a-h) MnBDC@75%GO nanocomposite

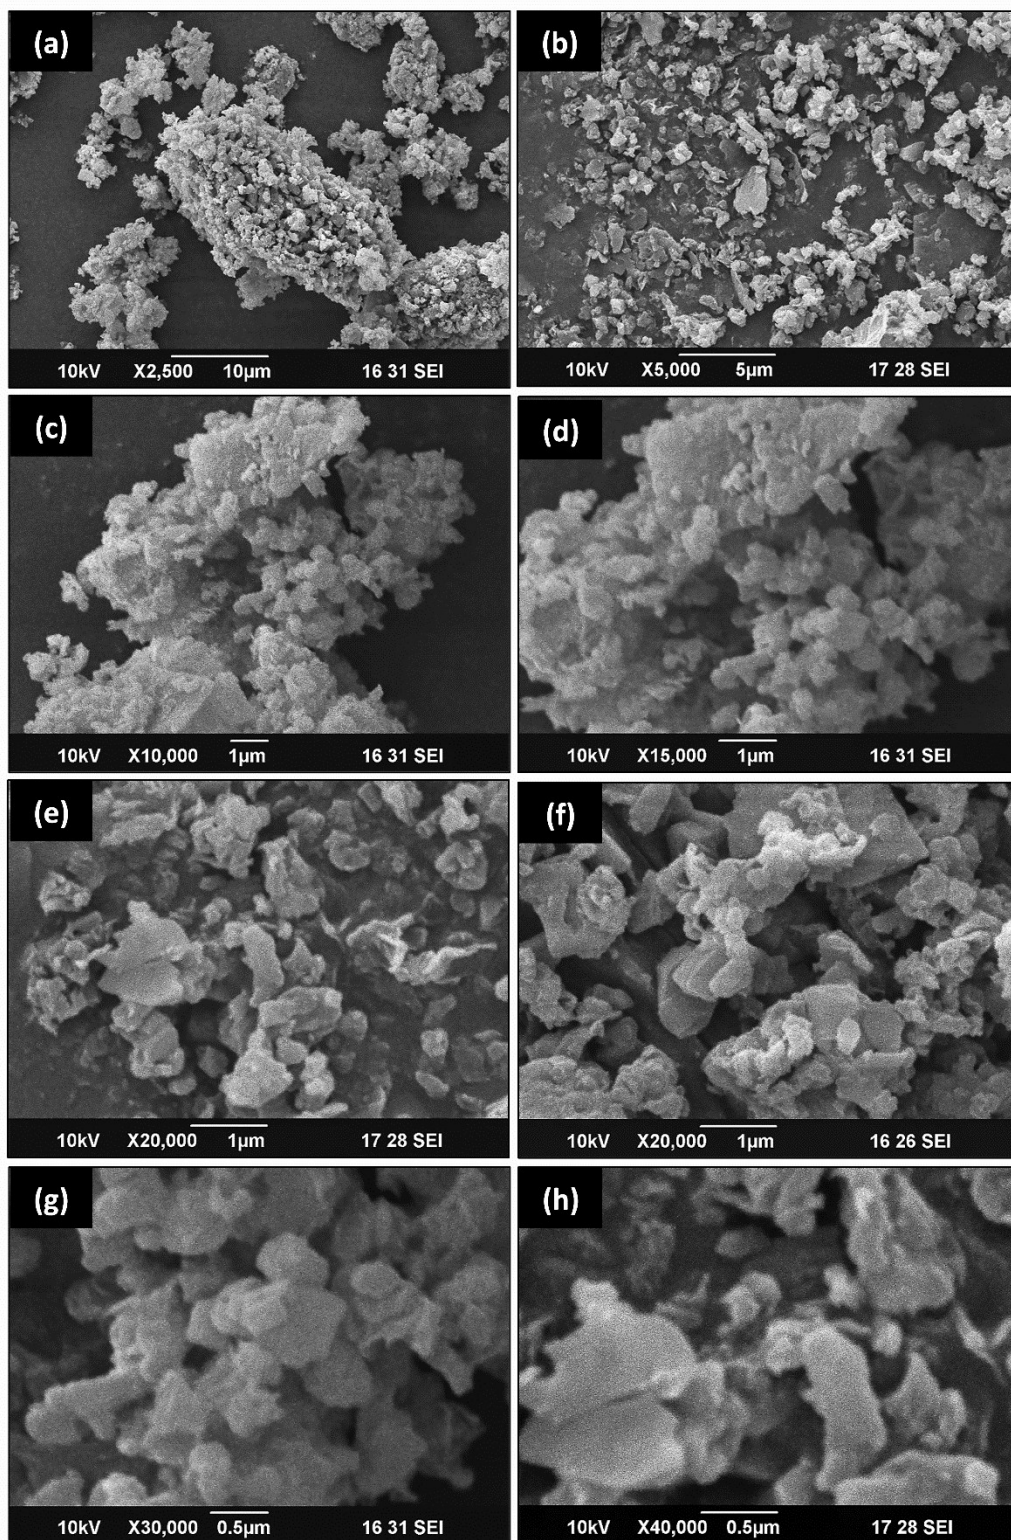

Fig. S4: SEM micrographs of (a-h) MnBDC@75%rGO nanocomposite

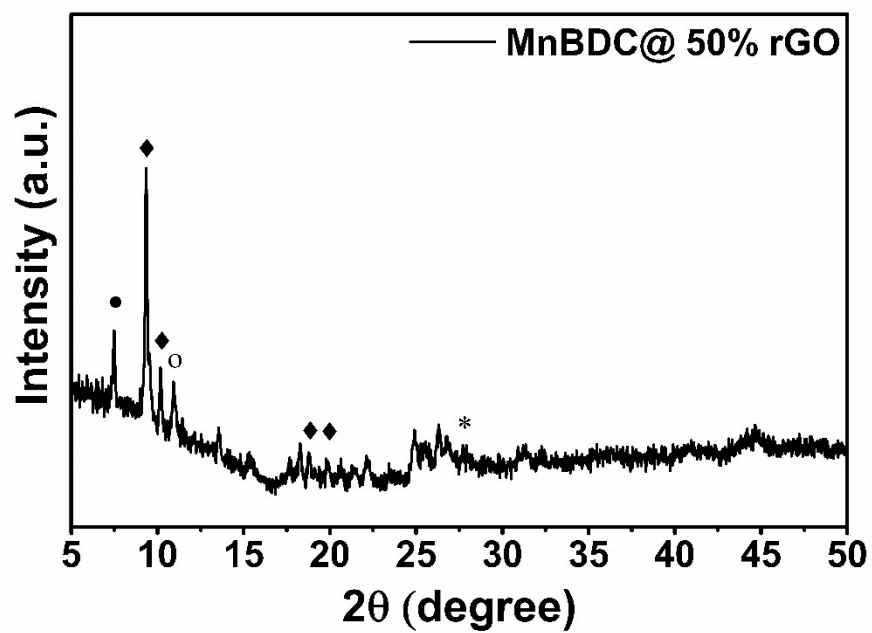

Fig. S5: XRD pattern of MnBDC@50%rGO nanocomposite

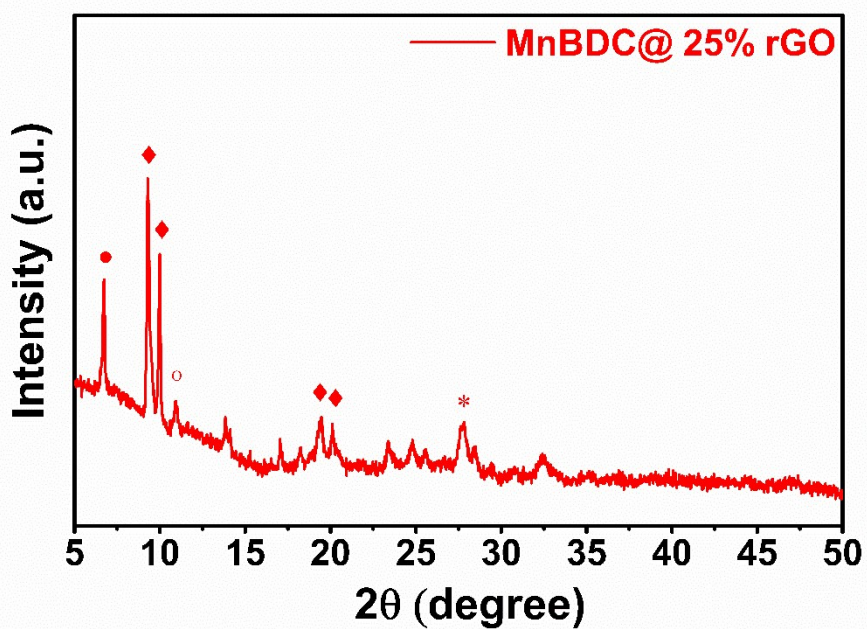

Fig. S6: XRD pattern of MnBDC@25%rGO nanocomposite

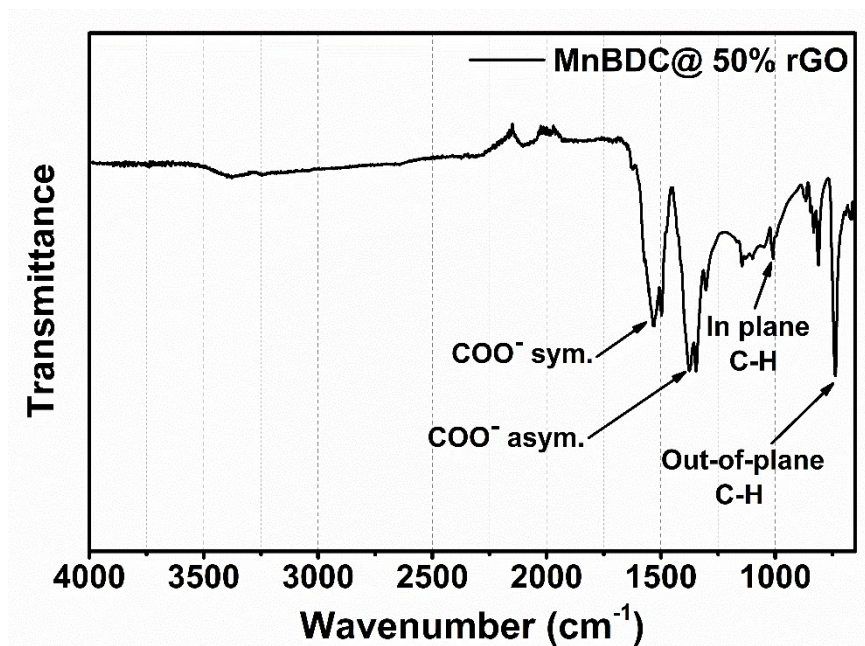

Fig. S7: FTIR spectrum of MnBDC@50%rGO nanocomposite

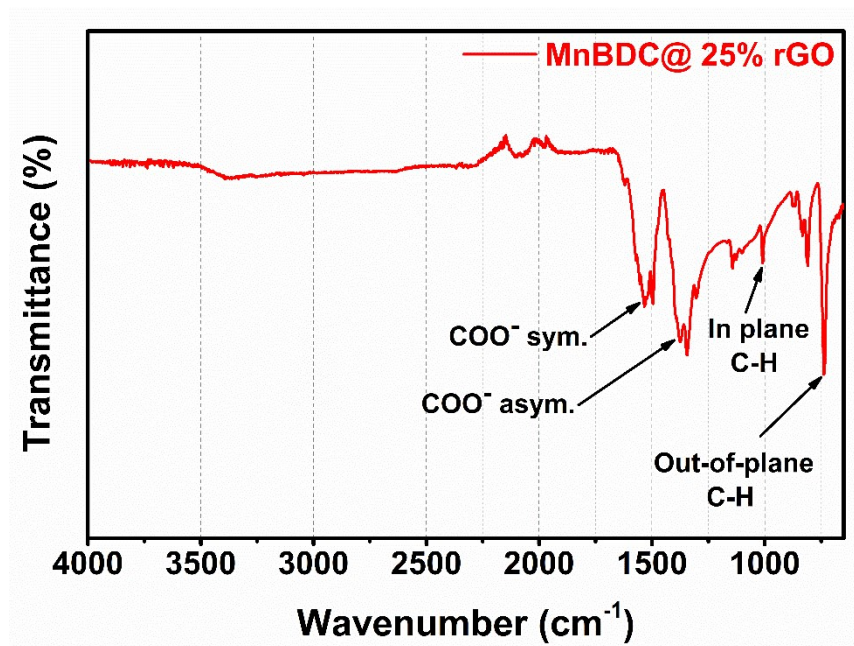

Fig. S8: FTIR spectrum of MnBDC@25%rGO nanocomposite

In Fig. S5 and Fig. S6, peaks of MnBDC, benzoic acid, benzophenone and rGO phases have been

Table S1: ORR and OER electrocatalytic performance parameters of recently reported rGO composite catalysts

| Catalyst ID                                                 | Oxygen reduction reaction |                                 |                         |                       |                                       | Oxygen evolution reaction |                                       |                      |
|-------------------------------------------------------------|---------------------------|---------------------------------|-------------------------|-----------------------|---------------------------------------|---------------------------|---------------------------------------|----------------------|
|                                                             | $E_{pc}$<br>V vs RHE      | $I_{pc}$<br>mA cm <sup>-2</sup> | $E_{onset}$<br>V vs RHE | $E_{1/2}$<br>V vs RHE | Tafel<br>slope<br>mVdec <sup>-1</sup> | $E_{onset}$<br>V vs RHE   | Tafel<br>slope<br>mVdec <sup>-1</sup> | Electrolyte          |
| NiCoMnO <sub>4</sub> /N-rGO [1]                             | 0.75                      | 0.84                            | 0.92                    | 0.75                  | 38                                    | 1.5                       | 128                                   | 0.1 M KOH            |
| ZIF-8 derived N-PC @Graphene [2]                            | 0.72                      | -                               | 1.01                    | 0.80                  | 66                                    | 1.63                      | 78                                    | 0.1 M KOH            |
| Fe/Fe <sub>3</sub> C@ 3D N-Graphene [3]                     | 0.77                      | -                               | -                       | -                     | 62.2                                  | 1.487                     | 30.1                                  | 0.1 M KOH<br>1 M KOH |
| CeO <sub>2</sub> /rGO [4]                                   | 0.74                      | 0.76                            | 0.761                   | -                     | -                                     | 1.33                      | 138                                   | 0.1 M KOH            |
| NiFe-LDH/rGO [5]                                            | 0.78                      | -                               | 0.796                   | -                     | -                                     | 1.47                      | 91                                    | 0.1 M KOH            |
| S-Co <sub>9-x</sub> Fe <sub>x</sub> S <sub>8</sub> @rGO [6] | -                         | -                               | 0.94                    | 0.84                  | 65                                    | 1.45<br>Approx.           | 66                                    | 0.1 M KOH            |
| NiCo <sub>2</sub> S <sub>4</sub> @N/S-rGO [7]               | 0.76                      | -                               | 0.91<br>approx.         | 0.79<br>approx.       | -                                     | 1.61<br>approx.           | -                                     | 0.1 M KOH            |
| MnBDC@75%rGO<br>(this work)                                 | 0.78                      | 0.70                            | 1.09                    | 0.94                  | 93.5                                  | 1.72                      | 0.83                                  | 0.1 M KOH            |

designated with diamond (◊), dot (●), circle (o) and asterick (\*) signs respectively.

## References:

- [1] A. Pendashteh, J. Palma, M. Anderson, and R. Marcilla, NiCoMnO<sub>4</sub> nanoparticles on N-doped graphene: Highly efficient bifunctional electrocatalyst for oxygen reduction/evolution reactions, *Applied Catalysis B: Environmental*, 2017, **201**, 241-252.
- [2] S. Liu, H. Zhang, Q. Zhao, X. Zhang, R. Liu, X. Ge, G. Wang, H. Zhao and W. Cai, Metal-organic framework derived nitrogen-doped porous carbon@ graphene sandwich-like structured composites as bifunctional electrocatalysts for oxygen reduction and evolution reactions, *Carbon*, 2016, **106**, 74-83.
- [3] L. Wei, H. E. Karahan, S. Zhai, H. Liu, X. Chen, Z. Zhou, Y. Lei, Z. Liu, and Y. Chen, Amorphous bimetallic oxide-graphene hybrids as bifunctional oxygen electrocatalysts for rechargeable Zn-air batteries, *Advanced Materials*, 2017, **29**, 1701410.
- [4] L. Sun, L. Zhou, C. Yang, and Y. Yuan, CeO<sub>2</sub> nanoparticle-decorated reduced graphene oxide as an efficient bifunctional electrocatalyst for oxygen reduction and evolution reactions. *International Journal of Hydrogen Energy*, 2017, **42**, 15140-15148.
- [5] T. Zhan, Y. Zhang, X. Liu, S. Lu and W. Hou, 2016. NiFe layered double hydroxide/reduced graphene oxide nanohybrid as an efficient bifunctional electrocatalyst for oxygen evolution and reduction reactions. *Journal of Power Sources*, 2016, **333**, 53-60.
- [6] T. Liu, F. Yang, G. Cheng and W. Luo, 2018. Reduced Graphene Oxide-Wrapped Co<sub>9</sub>-xFe<sub>x</sub>S<sub>8</sub>/Co, Fe-N-C Composite as Bifunctional Electrocatalyst for Oxygen Reduction and Evolution. *Small*, 2018, **14**, p.1703748.
- [7] Q. Liu, J. Jin and J. Zhang, NiCo<sub>2</sub>S<sub>4</sub>@ graphene as a bifunctional electrocatalyst for oxygen reduction and evolution reactions. *ACS applied materials & interfaces*, 2013, **5**, 5002-5008.
